# Supplementary material for: Integrating network pharmacology and animal experimental validation to investigate the action mechanism of oleanolic acid in obesity
Source: Springer Nature journal article supplement (doi:10.1186/s12967-023-04840-x), 2024-01-21

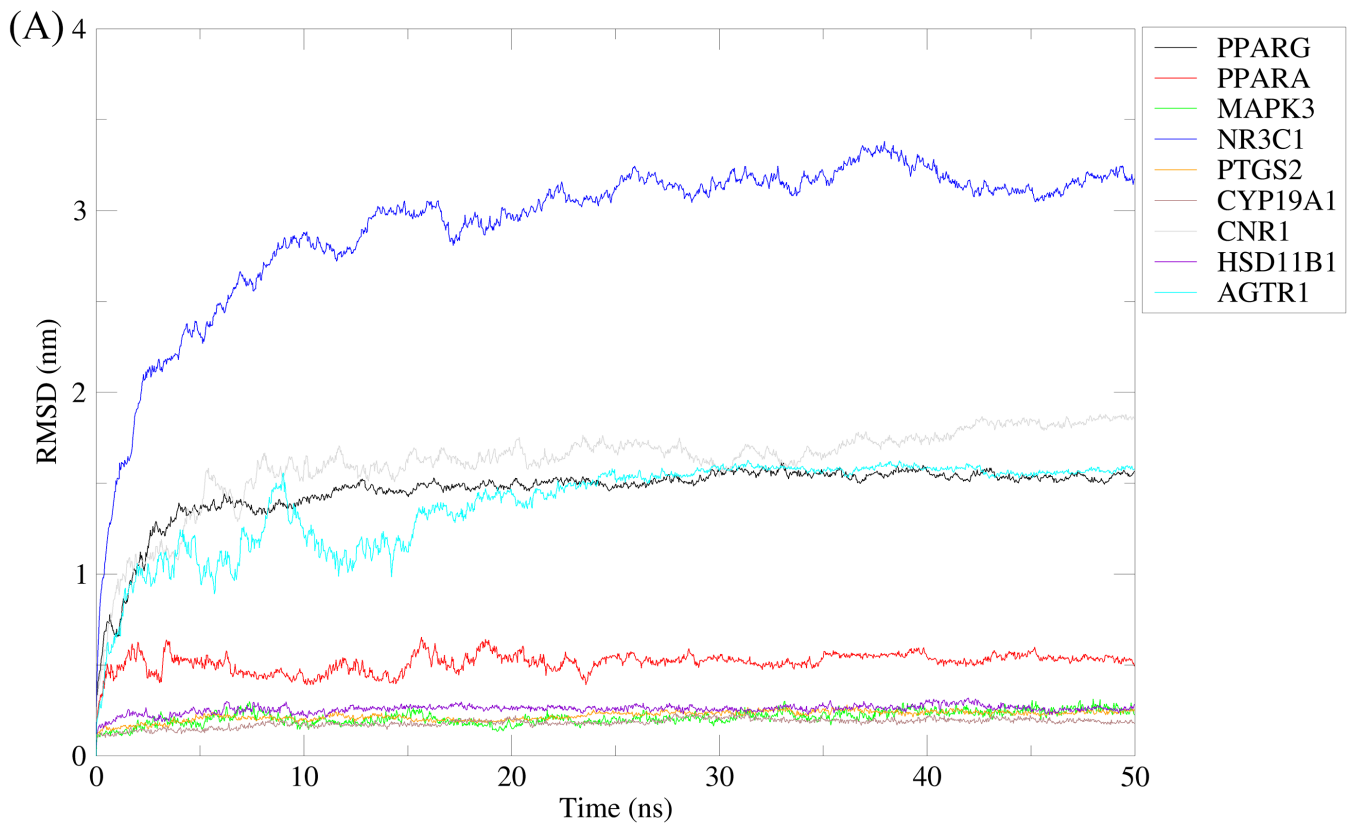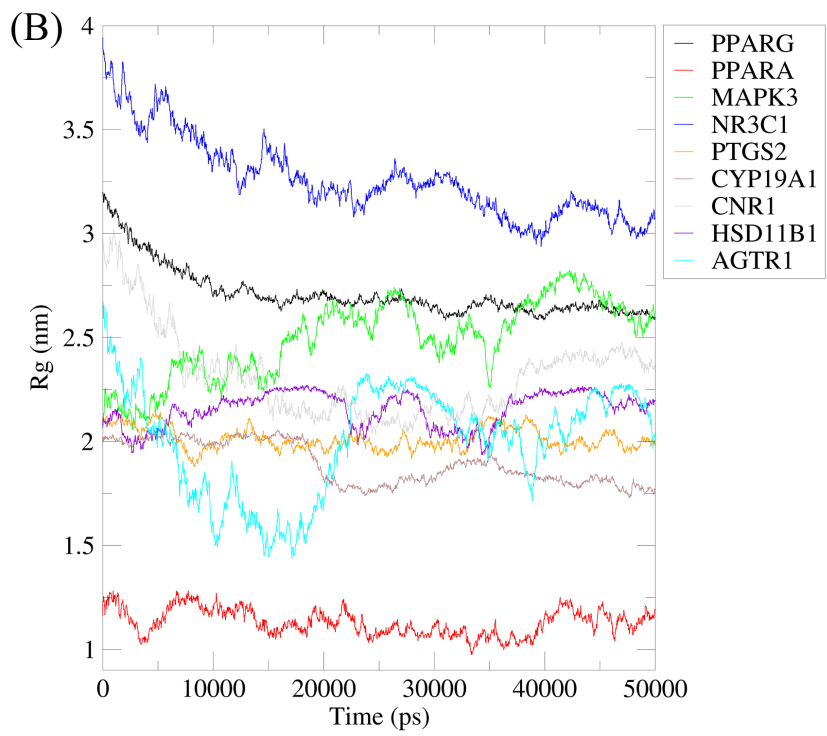

Supplement: MOESM1 [file 26648284]
